# Supplementary material
Source: PubMed Central journal article supplement (PMC2677037)
Supplement: hesr0044-0717-SD2.pdf [file hesr0044-0717-SD2.pdf]

**Manuscript Number: HSR-08-0055**

**APPENDIX A**  
**SUPPLEMENTAL RESULTS**

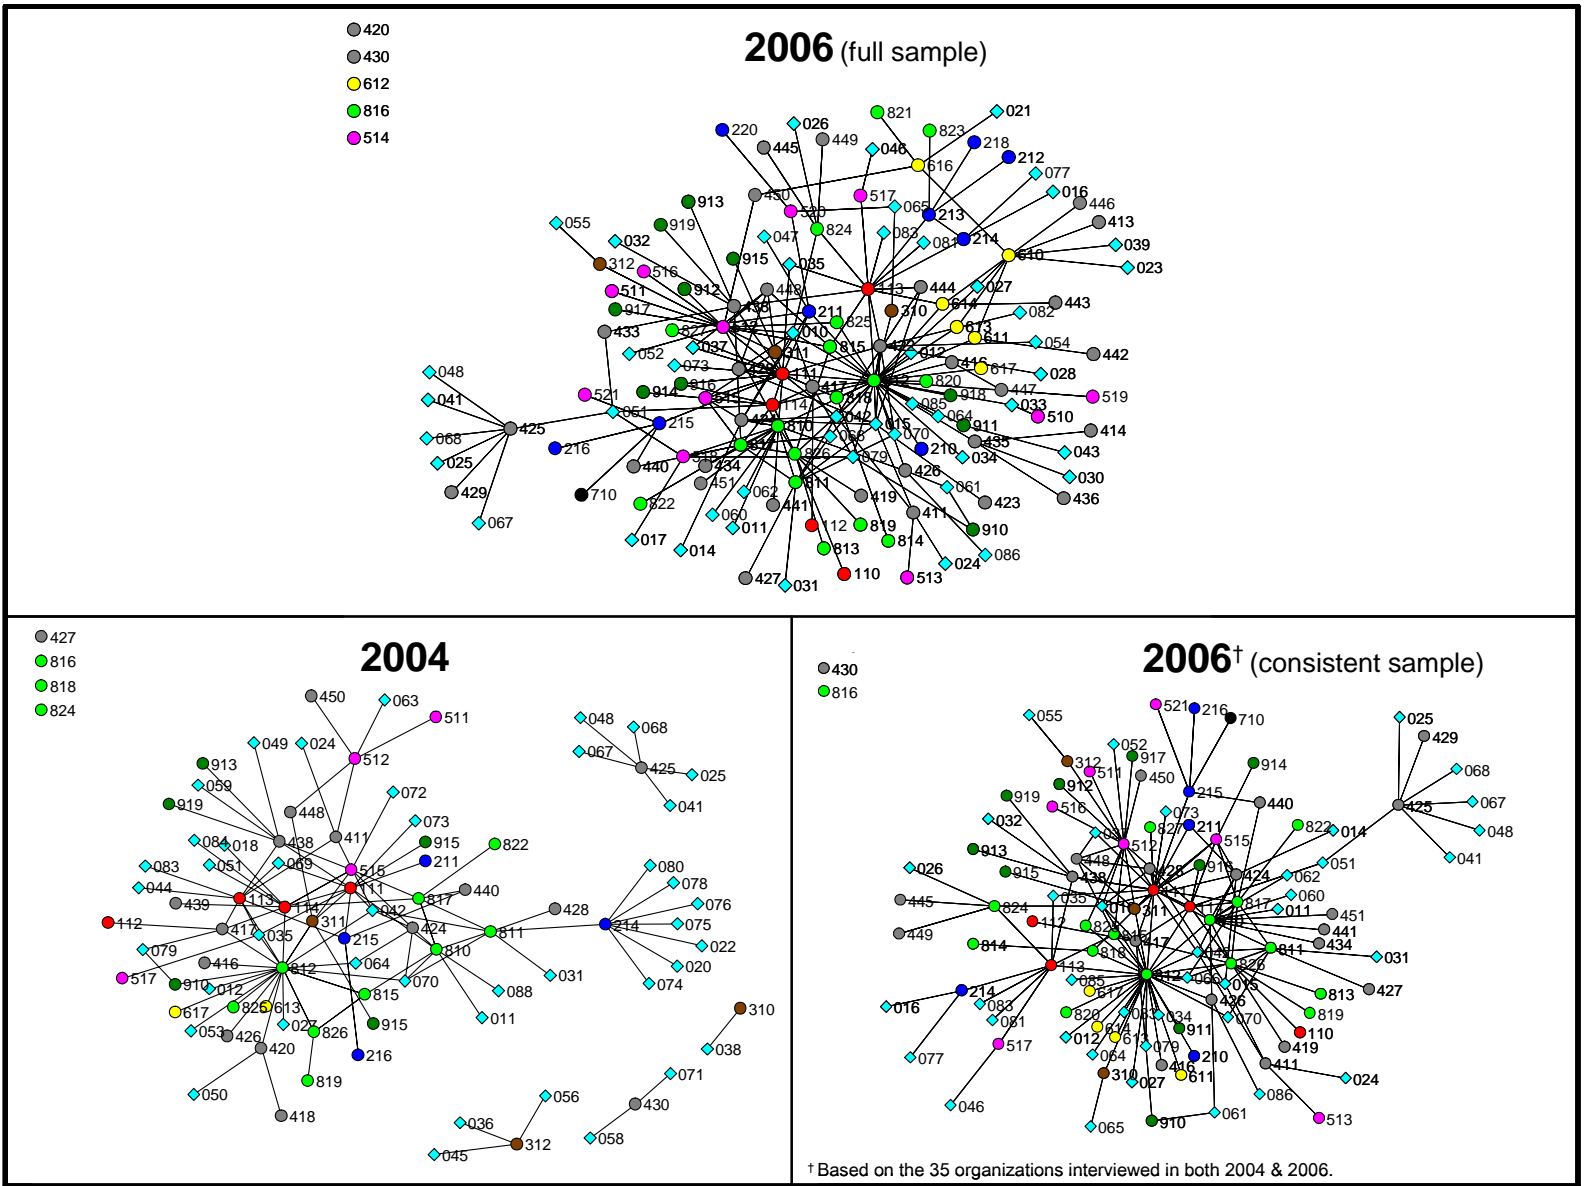

**Figure A.1 Overall Patient Safety Partnership Networks, 2004 and 2006**

**Table A.1 Cross-Tabulation of Partnerships by Organization Type, 2006 (full sample)**

| Organization Type of Interviewed Organizations   | Organization Type of Reported Partners |                            |                 |                               |                                       |                                  |       |                           |                 |                            |
|--------------------------------------------------|----------------------------------------|----------------------------|-----------------|-------------------------------|---------------------------------------|----------------------------------|-------|---------------------------|-----------------|----------------------------|
|                                                  | Accredit-<br>ing/<br>Standards         | Consumer<br>/<br>Purchaser | Founda-<br>tion | Health<br>Industry/<br>Prof'l | Health<br>Policy/<br>Improve-<br>ment | Health<br>Informa-<br>tion Techn | Gov't | Academic<br>/<br>Research | Consult-<br>ing | Group<br>Partner-<br>ships |
| Accrediting/<br>Standards (n=16)                 | 6.3%                                   | 6.3%                       | 0%              | 0%                            | 6.3%                                  | 0%                               | 18.8% | 12.5%                     | 0%              | 50.0%                      |
| Consumer/<br>Purchaser (n=16)                    | 18.8%                                  | 31.3%                      | 0%              | 0%                            | 6.3%                                  | 0%                               | 18.8% | 0%                        | 6.3%            | 18.8%                      |
| Foundation (n=8)                                 | 12.5%                                  | 0%                         | 0%              | 12.5%                         | 25.0%                                 | 0%                               | 12.5% | 12.5%                     | 0%              | 25.0%                      |
| Health Industry/<br>Professional (n=62)          | 14.5%                                  | 3.2%                       | 0%              | 9.7%                          | 4.8%                                  | 0%                               | 14.5% | 3.2%                      | 0%              | 50.0%                      |
| Health Policy/<br>Improvement<br>(n=26)          | 15.4%                                  | 7.7%                       | 3.8%            | 7.7%                          | 7.7%                                  | 0%                               | 15.4% | 11.5%                     | 0%              | 30.8%                      |
| Health Information<br>Technology (HIT)<br>(n=18) | 5.6%                                   | 0%                         | 0%              | 27.8%                         | 0%                                    | 27.8%                            | 16.7% | 0%                        | 0%              | 22.2%                      |
| Government (n=69)                                | 11.6%                                  | 1.4%                       | 1.4%            | 13.0%                         | 2.9%                                  | 5.8%                             | 29.0% | 1.4%                      | 0%              | 33.3%                      |
| Academic/Research<br>(n=5)                       | 0%                                     | 0%                         | 0%              | 0%                            | 20.0%                                 | 0%                               | 20.0% | 0%                        | 0%              | 60.0%                      |
| TOTAL (n=220)                                    | 12.3%                                  | 5.0%                       | 0.9%            | 10.5%                         | 5.5%                                  | 4.1%                             | 20.0% | 4.1%                      | 0.5%            | 37.3%                      |

Note: *n* represents number of ongoing partnerships as of the time of the interviews. Pearson Chi-Square test:  $\chi^2 = 117.99$  ( $df = 63$ ,  $p < 0.00$ )

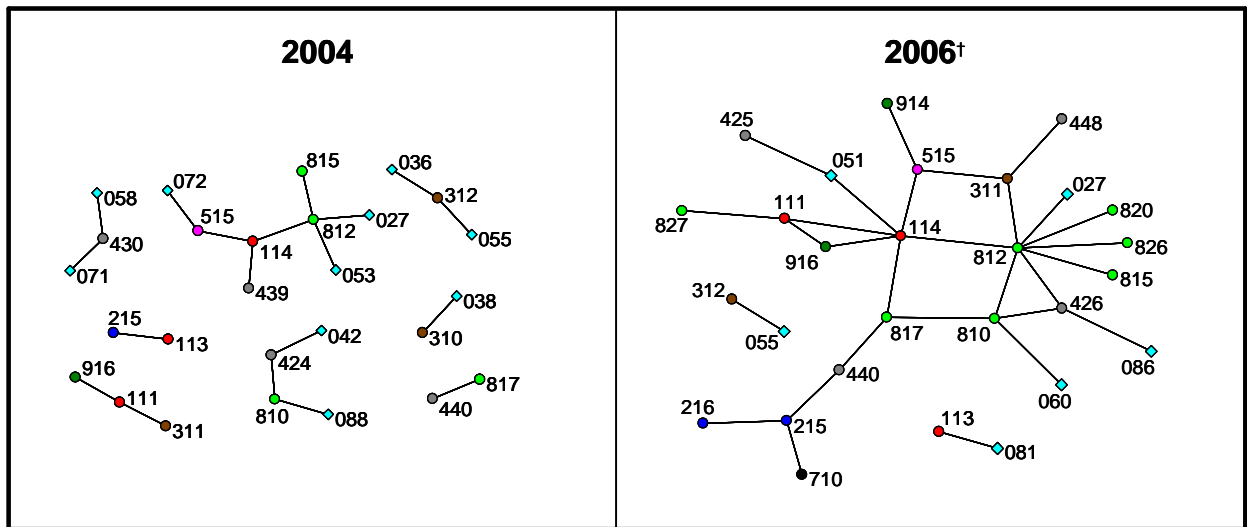

**Figure A.2 Research-Related Partnerships, 2004 and 2006**

† Consistent sample based on the 35 organizations interviewed in both 2004 & 2006.

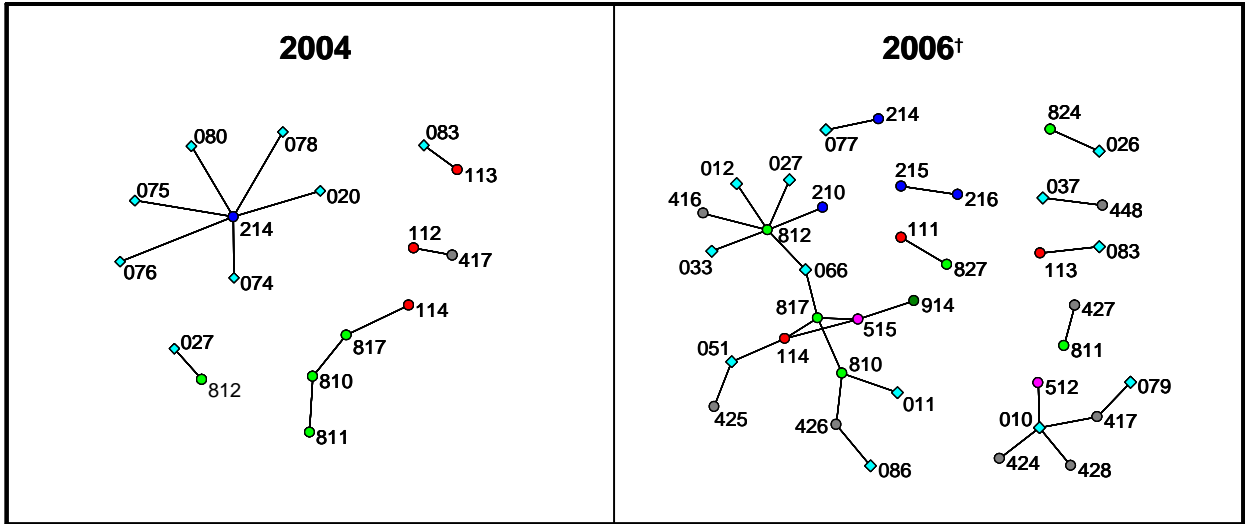

**Figure A.3 Policy Change & Advocacy Partnerships, 2004 and 2006**

† Consistent sample based on the 35 organizations interviewed in both 2004 & 2006.
